# Supplementary material for: A Comparative Study of Particulate Matter Between New Delhi, India and Riyadh, Saudi Arabia During the COVID-19 Lockdown Period
Source: Frontiers journal article supplement (doi:10.3389/fenvs.2021.784959), 2022-01-14
Supplement: Data_Sheet_1.pdf [file Data_Sheet_1.pdf]

## Supplementary File

### A Comparative Study of Particulate Matter between New Delhi, India and Riyadh, Saudi Arabia during the COVID-19 lockdown period

Bhupendra Pratap Singh<sup>1\*</sup>, Gaber E. Eldesoky<sup>2</sup>, Pramod Kumar<sup>3</sup>, Prakash Chandra<sup>4</sup>, Md Ataul Islam<sup>5</sup>, Shakilur Rahman<sup>6</sup>

<sup>1</sup>Department of Environmental Studies, Deshbandhu College, University of Delhi, New Delhi, India

<sup>2</sup>Chemistry Department, College of Science, King Saud University, Riyadh 11451, Saudi Arabia

<sup>3</sup>Department of Chemistry, Sri Aurobindo College, University of Delhi, New Delhi, India

<sup>4</sup>Department of Biotechnology, Delhi Technological University, New Delhi, India

<sup>5</sup>Division of Pharmacy and Optometry, School of Health Sciences, Faculty of Biology, Medicine, and Health, University of Manchester, Manchester, United Kingdom

<sup>6</sup>Department of Medical Elementology and Toxicology, School of Chemical and Life Sciences, Jamia Hamdard, New Delhi

## Results and Discussion

### Figures

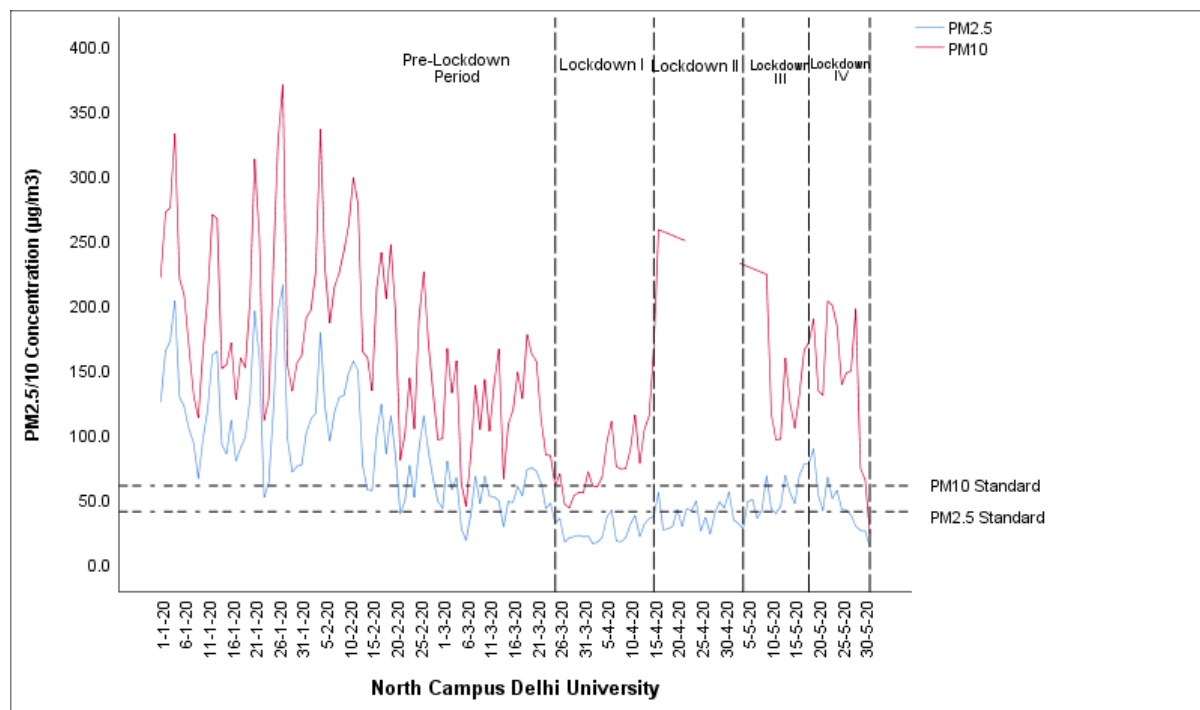

SFig. 1: Concentration of PM<sub>2.5</sub>/10 pre- and during the lockdown period, North Campus Delhi University

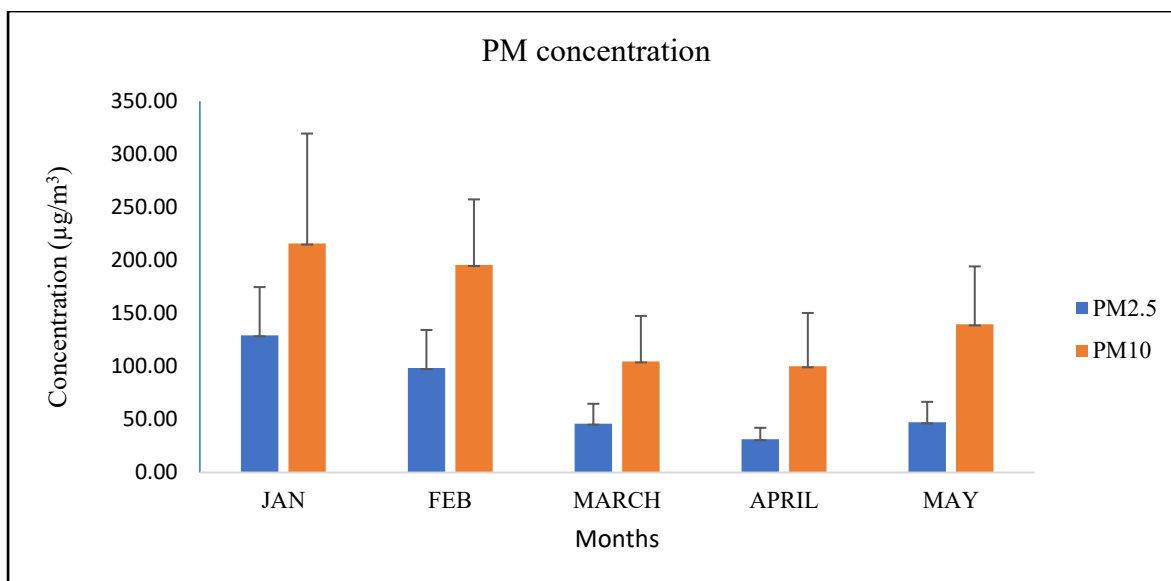

SFig 2: Mean concentration of PM<sub>2.5</sub> and PM<sub>10</sub> during the Covid-19 pandemic, North Campus Delhi University

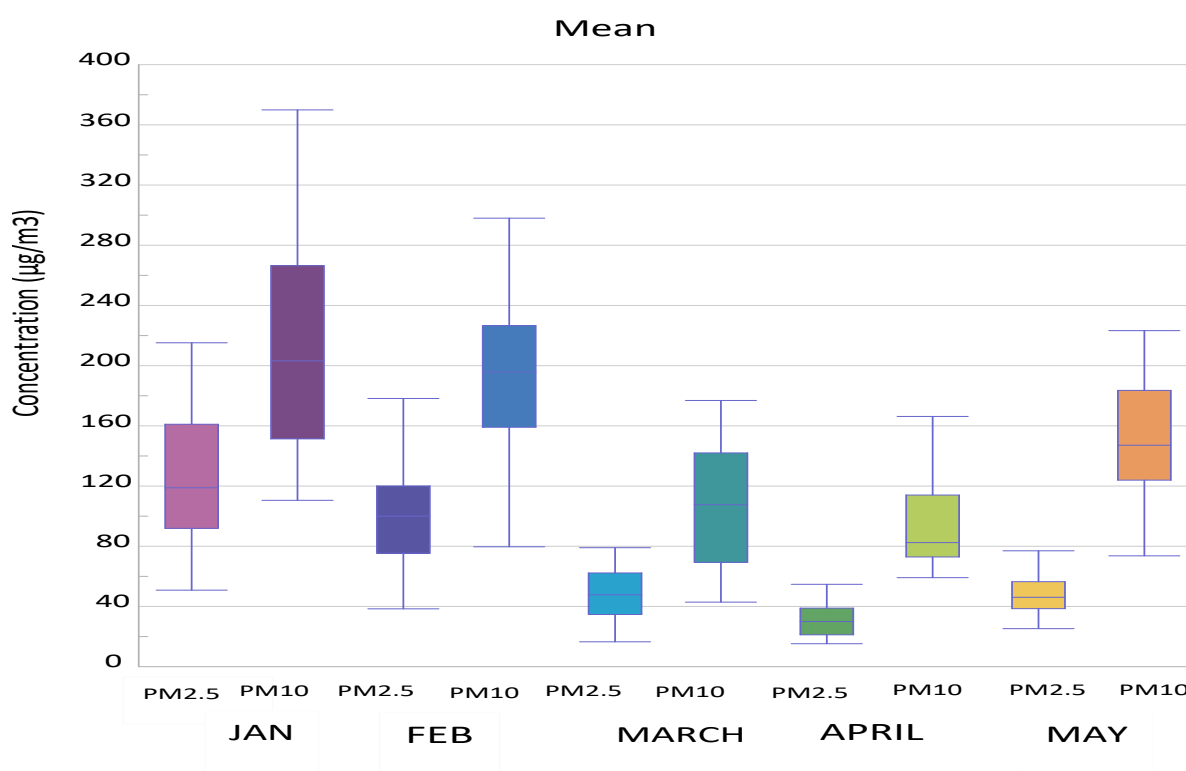

SFig 3: Mean, maximum and minimum concentration of PM<sub>2.5</sub> and PM<sub>10</sub> during the Covid-19 pandemic, North Campus Delhi University

Stable 1: Correlation between meteorological parameters, PM<sub>2.5</sub> and PM<sub>10</sub> concentration on ambient sample.

| Meteorological Parameters | PM <sub>2.5</sub> | PM <sub>10</sub> |
|---------------------------|-------------------|------------------|
| Temperature (°C)          | -0.61             | -0.35            |
| Relative Humidity (%)     | 0.51              | 0.21             |
| Wind Speed (Km/h)         | -0.28             | -0.24            |
